# Supplementary material for: Food governance for better access to sustainable diets: A review
Source: Frontiers journal article supplement (doi:10.3389/fsufs.2022.784264), 2022-09-08
Supplement: Table_1.xlsx [file Table_1.xlsx]

## Sheet: Wrong focus
Title	Authors	Published Year	Study
Empowering the citizen-consumer: re-regulating consumer information to support the transition to sustainable and health promoting food systems in Canada.	MacRae, R.; Szabo, M.; Anderson, K.; Louden, F.; Trillo, S.	2012	MacRae 2012
The Case for Public Financing of Environmental Common Goods for Health	Lo, Selina; Gaudin, Sylvestre; Corvalan, Carlos; Earle, Alexandra J.; Pruss-Ustun, Annette; Neira, Maria; Soucat, Agnes; Hanssen, Odd	2019	Lo 2019
'Sustainability does not quite get the attention it deserves': synergies and tensions in the sustainability frames of Australian food policy actors	Trevena, Helen; Kaldor, Jenny C.laire; Downs, Shauna M.	2015	Trevena 2015
Reframing the debate on urbanisation, rural transformation and food security.	Tacoli, C.; Vorley, B.	2015	Tacoli 2015
Agri-food system transformations and diet-related chronic disease in Australia: a nutrition-oriented value chain approach	Hattersley, Libby	2013	Hattersley 2013
Research and innovation as a catalyst for food system transformation.	Boer, A. C. L. den; Kok, K. P. W.; Gill, M.; Breda, J.; Cahill, J.; Callenius, C.; Caron, P.; Damianova, Z.; Gurinovic, M.; Lahteenmaki, L.; Lang, T.; Sonnino, R.; Verburg, G.; Westhoek, H.; Cesuroglu, T.; Regeer, B. J.; Broerse, J. E. W.	2021	Boer 2021
Governing urban food systems in the long run: comparing best practices in sustainable food procurement regulations.	Fesenfeld, L. P.	2016	Fesenfeld 2016
Four perspectives of sustainability applied to the local food strategy of Ghent (Belgium): need for a cycle of democratic participation?	Crivits, M.; Prove, C.; Block, T.; Dessein, J.	2016	Crivits 2016
Special Issue: Food systems and public health: linkages to achieve healthier diets and healthier communities.	Story, M., Hamm, M. W., & Wallinga, D. (2009). Food systems and public health: Linkages to achieve healthier diets and healthier communities. Journal of hunger & environmental nutrition, 4(3-4), 219-224.	2009	Story 2009
The paradox of productivity: agricultural productivity promotes food system inefficiency	Benton, Tim G; Bailey, Rob	2019	Benton 2019
From disaster management to adaptive governance? Governance challenges to achieving resilient food systems in Australia.	Smith, K.; Lawrence, G.	2018	Smith 2018
Aboriginal health learning in the forest and cultivated gardens: building a nutritious and sustainable food system	Stroink, Mirella L; Nelson, Connie H	2009	Stroink 2009
Climate change adaptation at the intersection of food and health	Edwards, Ferne; Dixon, Jane; Friel, Sharon; Hall, Gillian; Larsen, Kirsten; Lockie, Stewart; Wood, Beverley; Lawrence, Mark; Hanigan, Ivan; Hogan, Anthony; Hattersley, Libby	2011	Edwards 2011
Transition heuristic frameworks in research on agro-food sustainability transitions.	El-Bilali, H.	2020	El-Bilali 2020
A new understanding and evaluation of food sustainability in six different food systems in Kenya and Bolivia	Llanque, Aymara; Giger, Markus; Augstburger, Horacio; Buergi-Bonanomi, Elisabeth; Tribaldos, Theresa; Jacobi, Johanna; Ifejika Speranza, Chinwe; Mukhovi, Stellah; Mwangi, Veronica; Bessa, Adriana; Golay, Christophe; Haller, Tobias; Kiteme, Boniface P.; Delgado Burgoa, Jose M F; Rist, Stephan	2020	Llanque 2020
A food policy package for healthy diets and the prevention of obesity and diet-related non-communicable diseases: The NOURISHING framework	Hawkes, C.; Jewell, J.; Allen, K.	2013	Hawkes 2013
Governments, grassroots, and the struggle for local food systems: containing, coopting, contesting and collaborating.	Laforge, J. M. L.; Anderson, C. R.; McLachlan, S. M.	2017	Laforge 2017
Sustainable food systems, health and infectious diseases: Concerns and opportunities	Pradyumna, Adithya; Utzinger, Jurg; Egal, Florence	2019	Pradyumna 2019
Governance for urban food systems - recommendations from SUPURBFOOD project.	Schmid, O.; Moschitz, H.; Dubbeling, M.; Fritschi, R.; Jahrl, I.; Wiskerke, H.	2016	Schmid 2016
Trade, development, and regulatory issues in food	Ramaswamy, Sunder; Viswanathan, Brinda	2007	Ramaswamy 2007
Adaptation and development pathways for different types of farmers	Stringer, L.C.; Lyon, C.; Ward, C.F.M.; Fraser, E.D.G.; Harris, D.; Pereira, L.; Simelton, E.	2020	Stringer 2020
US-based food and agricultural value chains and their relevance to healthy diets	Gereffi, Gary; Lee, Joonkoo; Christian, Michelle	2009	Gereffi 2009
Food systems and public health: Linkages to achieve healthier diets and healthier communities	Story, Mary; Hamm, Michael W.; Wallinga, David	2009	Story 2009
How can health, agriculture and economic policy actors work together to enhance the external food environment for fruit and vegetables? A qualitative policy analysis in India	Thow, A. M.; Verma, G.; Soni, D.; Soni, D.; Beri, D. K.; Kumar, P.; Siegel, K. R.; Shaikh, N.; Khandelwal, S.	2018	Thow 2018
Transforming research and innovation for sustainable food systems-a coupled-systems perspective.	Kok, K. P. W.; Boer, A. C. L. den; Cesuroglu, T.; Meij, M. G. van der; Wildt-Liesveld, R. de; Regeer, B. J.; Broerse, J. E. W.	2019	Kok 2019
Empowering People—Democratising the Food System? Exploring the Democratic Potential of Food-Related Empowerment Forms	Bornemann, Basil; Weiland, Sabine	2019	Bornemann 2019
Leveraging Agriculture for Nutrition Impact through the Feed the Future Initiative	Du, Lidan; Pinga, Victor; Klein, Alyssa; Danton, Heather	2015	Du 2015
Getting civil about food: The interactions between civil society and the state to advance sustainable food systems in Canada	Koc, Mustafa; Macrae, Rod; Desjardins, Ellen; Roberts, Wayne	2008	Koc 2008
Addressing food poverty in systems: governance of food assistance in three European countries.	Galli, F.; Hebinck, A.; Carroll, B.	2018	Galli 2018
Paths of convergence for agriculture, health, and wealth	Dube, Laurette; Pingali, Prabhu; Webb, Patrick	2012	Dube 2012
Agricultural biodiversity as a link between traditional food systems and contemporary development, social integrity and ecological health	Johns, Timothy; Eyzaguirre, Pablo B; Powell, Bronwen; Maundu, Patrick	2013	Johns 2013
Nutrition-sensitive agriculture - a South African perspective.	McLachlan, M.; Landman, A. P.	2013	McLachlan 2013
Digital solutions for nutrition-sensitive SME transformation.	Trendov, N.; Liu Bin; Anta, M.; Zeng Meng	2020	Trendov 2020
From "Healthy Eating" to a Holistic Approach to Current Food Environments	Traverso-Yepez, M.; Hunter, K.	2016	Traverso-Yepez 2016
The potential of diversified agroecological systems to deliver healthy outcomes: making the link between agriculture, food systems & health.	Frison, E.; Clement, C.	2020	Frison 2020
First Nations Peoples' Participation in the Development of Population-Wide Food and Nutrition Policy in Australia: A Political Economy and Cultural Safety Analysis	Browne, Jennifer; Backholer, Kathryn; Gilmore, Michelle; Lock, Mark	2020	Browne 2020
Nutrition Transition and Climate Risks in Nigeria: Moving Towards Food Systems Policy Coherence	Morgan, Alexandra E.; Fanzo, Jessica	2020	Morgan 2020
Food systems for sustainable development: proposals for a profound four-part transformation.	Caron, P.; Ferrero y de Loma-Osorio, G.; Nabarro, D.; Hainzelin, E.; Guillou, M.; Andersen, I.; Arnold, T.; Astralaga, M.; Beukeboom, M.; Bickersteth, S.; Bwalya, M.; Caballero, P.; Campbell, B. M.; Divine, N.; Fan ShengGen; Frick, M.; Friis, A.; Gallagher, M.; Halkin, J. P.; Hanson, C.; Lasbennes, F.; Ribera, T.; Rockstrom, J.; Schuepbach, M.; Steer, A.; Tutwiler, A. [et al]	2018	Caron 2018
Agricultural biodiversity, social-ecological systems and sustainable diets.	Allen, T.; Prosperi, P.; Cogill, B.; Flichman, G.	2014	Allen 2014
Mainstreaming Underutilized Indigenous and Traditional Crops into Food Systems: A South African Perspective	Mabhaudhi, T.; Chibarabada, T. P.; Chimonyo, V. G. P.; Murugani, V. G.; Pereira, L. M.; Sobratee, N.; Govender, L.; Slotow, R.; Modi, A. T.	2019	Mabhaudhi 2019
Linking sustainable agriculture and public health: Opportunities for realizing multiple goals	Hamm, Michael W.	2008	Hamm 2008
Testing the price and affordability of healthy and current (unhealthy) diets and the potential impacts of policy change in Australia	Lee, Amanda J.; Kane, Sarah; Ramsey, Rebecca; Good, Elizabeth; Dick, Mathew	2016	Lee 2016
The importance of food systems and the environment for nutrition	Fanzo, Jessica; Bellows, Alexandra L.; Spiker, Marie L.; Thorne-Lyman, Andrew L.; Bloem, Martin W.	2021	Fanzo 2021
Why food in health security (FIHS)?	Wahlqvist, M. L.	2009	Wahlqvist 2009
Creating sustainable, resilient food systems for healthy diets.	Herforth, A.; Ahmed, S.; Declerck, F.; Fanzo, J.; Remans, R.	2017	Herforth 2017
The role of food policy councils in developing sustainable food systems	Schiff, Rebecca	2008	Schiff 2008
Linking biodiversity, diet and health in policy and practice	Johns, T.; Eyzaguirre, P. B.	2006	Johns 2006
Integrating fisheries, food and nutrition - Insights from people and policies in Timor-Leste.	Farmery, A. K.; Kajlich, L.; Voyer, M.; Bogard, J. R.; Duarte, A.	2020	Farmery 2020
Creating momentum for nutrition-sensitive agriculture: experiences and lessons from the Australian aid program.	Carter, L.; Peishi, Z.	2018	Carter 2018
Local solutions for sustainable food systems: the contribution of orphan crops and wild edible species.	Borelli, T.; Hunter, D.; Padulosi, S.; Amaya, N.; Meldrum, G.; Beltrame, D. M. de O.; Samarasinghe, G.; Wasike, V. W.; Guner, B.; Tan, A.; Dembele, Y. K.; Lochetti, G.; Sidibe, A.; Tartanac, F.	2020	Borelli 2020
Food production and consumption in Bamyan Province, Afghanistan: the challenges of sustainability and seasonality for dietary diversity	Poole, N.; Amiri, H.; Amiri, S. M.; Farhank, I.; Zanelli, G.	2019	Poole 2019
Regional food culture and development	Lee, Meei-Shyuan; Wahlqvist, Mark L.	2007	Lee 2007
Linking vegetable preferences, health and local food systems through community-supported agriculture	Wilkins, Jennifer L.; Farrell, Tracy J.; Rangarajan, Anusuya	2015	Wilkins 2015
Food policies: A threat to health?	Lobstein, Tim	2002	Lobstein 2002
Local foodscapes: place and power in the agri-food system.	Sonnino, R.	2013	Sonnino 2013
Transforming governance in telecoupled food systems.	Eakin, H.; Rueda, X.; Mahanti, A.	2017	Eakin 2017
Sustainable diets within sustainable food systems.	Meybeck, A.; Gitz, V.	2017	Meybeck 2017
A 'common food policy' for Europe: how governance reforms can spark a shift to healthy diets and sustainable food systems.	Schutter, O. de; Jacobs, N.; Clement, C.	2020	Schutter 2020
The Role of Healthy Diets in Environmentally Sustainable Food Systems	Clark, Michael; Macdiarmid, Jennie; Jones, Andrew D.; Ranganathan, Janet; Herrero, Mario; Fanzo, Jessica	2020	Clark 2020
Agricultural biodiversity, nutrition, and health: Making a difference to hunger and nutrition in the developing world	Frison, Emile A.; Smith, Ifeyironwa Francisca; Cherfas, Jeremy; Eyzaguirre, Pablo B.; Johns, Timothy	2006	Frison 2006
Hungry in the heartland: Using community food systems as a strategy to reduce rural food deserts	Mader, Erin; Busse, Heidi	2011	Mader 2011
Demand-Side Food Policies for Public and Planetary Health	Temme, E. H. M.; Vellinga, R. E.; de Ruiter, H.; Kugelberg, S.; van de Kamp, M.; Milford, A.; Alessandrini, R.; Bartolini, F.; Sanz-Cobena, A.; Leip, A.	2020	Temme 2020
Insights from agroecology and a critical next step: integrating human health.	O'Rourke, M. E.; DeLonge, M. S.; Salvador, R.	2017	O'Rourke 2017
National food policies in the islamic republic of iran aimed at control and prevention of noncommunicable diseases	Moslemi, Masoumeh; Jannat, Behrooz; Kheirandish, Mehrnaz; Mazaheri, Ramin Nezhad Fard; Hosseini, Hedayat; Mofid, Vahid; Moghadd-Am, Atefeh; Karimian, Nader	2020	Moslemi 2020
Obesity and the food system transformation in Latin America	Popkin, B.M.; Reardon, T.	2018	Popkin 2018
Food decision-making framework: Connecting sustainable food systems to health and well-being	Gillespie, Ardyth H.; Smith, Laura E.	2008	Gillespie 2008
Modelling the cost differential between healthy and current diets: The New Zealand case study	Vandevijvere, Stefanie; Mackay, Sally; Swinburn, Boyd; Young, Nick; Gahegan, Mark	2018	Vandevijvere 2018
Healthy and sustainable diets: The development and application of a policy analysis framework	Downs, Shauna; Payne, Alex; Fanzo, Jessica	2016	Downs 2016
Assessing gaps and opportunities for policy to promote healthy diets in the development of food sovereignty legislation in Ecuador	Garton, K.	2014	Garton 2014
Leveraging food and agriculture policy mapping and analysis for nutrition-sensitive planning	Meerman, Janice; Dode, Marie Caroline; Dufour, Charlotte	2016	Meerman 2016
A new paradigm for world agriculture: productive, sustainable and nutritious food systems to meet human needs.	Graham, R. D.; Welch, R. M.	1999	Graham 1999
The potential contribution of livestock to food nutrition security: the application of the One Health approach in livestock policy and practice.	Nabarro, D.; Wannous, C.	2014	Nabarro 2014
Sustaining healthy diets: The role of capture fisheries and aquaculture for improving nutrition in the post-2015 era	Thilsted, S. H.; Thorne-Lyman, A.; Webb, P.; Bogard, J. R.; Subasinghe, R.; Phillips, M. J.; Allison, E. H.	2016	Thilsted 2016
The role of metrics in food policy: lessons from a decade of experience in New York City.	Freudenberg, N.; Willingham, C.; Cohen, N.	2018	Freudenberg 2018
A new paradigm for world agriculture: meeting human needs productive, sustainable, nutritious.	Welch, R. M.; Graham, R. D.	1999	Welch 1999
Why Food System Transformation Is Essential and How Nutrition Scientists Can Contribute	Lartey, Anna; Meerman, Janice; Wijesinha-Bettoni, Ramani	2018	Lartey 2018
Food Systems and Public Health: The Community Perspective	Herrera, Henry; Khanna, Navina; Davis, Leon	2009	Herrera 2009
Systemic analysis of Food Supply and Distribution Systems in city-region systems - an examination of FAO's policy guidelines towards sustainable agri-food systems.	Armendariz, V.; Armenia, S.; Atzori, A. S.	2016	Armendariz 2016
Understanding the Impact of Historical Policy Legacies on Nutrition Policy Space: Economic Policy Agendas and Current Food Policy Paradigms in Ghana	Thow, Anne Marie; Mulcahy, Georgina; Apprey, Charles; Annan, Reginald; Winters, Janelle; Stellmach, Darryl; Alders, Robyn; Aduku, Linda Nana Esi	2020	Thow 2020
MINIMUM WAGES AND HEALTHY DIET	Clark, Kathryn L; Pohl, R Vincent; Thomas, Ryan C	2020	Clark 2020
Position of the American Dietetic Association: food and nutrition professionals can implement practices to conserve natural resources and support ecological sustainability	Harmon, Alison H; Gerald, Bonnie L	2007	Harmon 2007
Nutritious subsistence food systems.	Graham, R. D.; Welch, R. M.; Saunders, D. A.; Ortiz-Monasterio, I.; Bouis, H. E.; Bonierbale, M.; Haan, S. de; Burgos, G.; Thiele, G.; Liria, R.; Meisner, C. A.; Beebe, S. E.; Potts, M. J.; Kadian, M.; Hobbs, P. R.; Gupta, R. K.; Twomlow, S.	2007	Graham 2007
Exploring the dynamics of food-related policymaking processes and evidence use in Fiji using systems thinking	Gade Waqa; Moodie, Marj; Snowdon, Wendy; Latu, Catherine; Coriakula, Jeremaia; Allender, Steven; Bell, Colin	2017	GadeWaqa 2017
Sustainable agriculture and food, Volume 3: agriculture and food systems.	Pretty, J.	2008	Pretty 2008
Westernization of Asian diets and the transformation of food systems: implications for research and policy.	Pingali, P.	2007	Pingali 2007
The potential for competitive and healthy food chains of benefit to the countryside	Traill, W. B.; Arnoult, M. H. P.; Chambers, S. A.; Deaville, E. R.; Gordon, M. H.; John, P.; Jones, P. J.; Kliem, K. E.; Mortimer, S. R.; Tiffin, J. R.	2008	Traill 2008
How important are supermarkets for the diets of the urban poor in Africa?	Wanyama, R.; Godecke, T.; Chege, C. G. K.; Qaim, M.	2019	Wanyama 2019
What does it cost to improve household diets in Nepal? Using the cost of the diet method to model lowest cost dietary changes.	Biehl, E.; Klemm, R. D. W.; Swetha Manohar; Webb, P.; Devendra Gauchan; West, K. P., Jr.	2016	Biehl 2016
Advancing healthy and sustainable food environments: the Flathead Reservation case study.	Ahmed, S.; Shanks, C. B.; Dupuis, V.; Pierre, M.	2019	Ahmed 2019
Promote healthy diets to reduce the double burden of malnutrition in India.	Silva, A. de	2018	Silva 2018
Agricultural biodiversity, social-ecological systems and sustainable diets	Allen, T., Prosperi, P., Cogill, B., & Flichman, G. (2014). Agricultural biodiversity, social–ecological systems and sustainable diets. Proceedings of the Nutrition Society, 73(4), 498-508.	2014	Allen 2014
Beyond eating right: The emergence of civic dietetics to foster health and sustainability through food system change	Wilkins, Jennifer L.; Lapp, Julia; Tagtow, Angie; Roberts, Susan	2010	Wilkins 2010
Application of multidimensional poverty index methodology to sustainable diets' measurement: Dimensions and concept	Ezekannagha, O.; Akinyele, I.	2013	Ezekannagha 2013
A healthier US diet could reduce greenhouse gas emissions from both the food and health care systems	Hallstrom, E.; Gee, Q.; Scarborough, P.; Cleveland, D. A.	2017	Hallstrom 2017
Future Smart Food: Harnessing the potential of neglected and underutilized species for Zero Hunger	Li, Xuan; Siddique, Kadambot H.M.	2020	Li 2020
Intersection of Diet, Health, and Environment: Land Grant Universities' Role in Creating Platforms for Sustainable Food Systems	Ringling, K. M.; Marquart, L. F.	2020	Ringling 2020
Multi-indicator sustainability assessment of global food systems	Chaudhary, Abhishek; Mathys, Alexander; Gustafson, David	2018	Chaudhary 2018
Eating green: The policy challenge of sustainable diets	Lang, T.	2011	Lang 2011
Food for all in 2020: Can the world be fed without damaging the environment?	Pinstrup-Andersen, Per; Pandya-Lorch, Rajul	1996	Pinstrup-Andersen 1996
'Du bist was du isst': challenges in European nutrition policy	Lafranconi, Alessandra; Birt, Christopher A.	2017	Lafranconi 2017
Environmental impacts of food consumption and nutrition: where are we and what is next?	Nemecek, Thomas; Jungbluth, Niels; i Canals, Llorenc Mila; Schenck, Rita	2016	Nemecek 2016
Food security in complex emergencies: Enhancing food system resilience	Pingali, Prabhu; Alinovi, Luca; Sutton, Jacky	2005	Pingali 2005
An integrated approach to identifying and characterising resilient urban food systems to promote population health in a changing climate	James, Sarah W.; Friel, Sharon	2015	James 2015
Promoting sustainable local food systems in the United States.	Dahlberg, K. A.	1999	Dahlberg 1999
Biodiversity and sustainability of indigenous peoples' foods and diets.	Kuhnlein, H. V.	2012	Kuhnlein 2012
Using dietary quality scores to assess sustainability of food products and human diets: a systematic review.	Hallstrom, E.; Davis, J.; Woodhouse, A.; Sonesson, U.	2018	Hallstrom 2018
Addressing malnutrition through nutritionsensitive agri-food policies in europe and central asia region	Dupouy, Eleonora; Kerekes, Kata; Gurinovic, Mirjana	2015	Dupouy 2015
Agricultural Biodiversity and Diets Evidence, Indicators, and Next Steps	Jones, A. D.; Kennedy, G.; Raneri, J. E.; Borelli, T.; Hunter, D.; Creed-Kanashiro, H. M.; Zimmerer, K. S.; DeHaan, S.	2019	Jones 2019
Regional foods in Brazilian school meals.	Fabri, R. K.; Proenca, R. P. C. da; Martinelli, S. S.; Cavalli, S. B.	2015	Fabri 2015
Traditional diets; their value and preservation.	Wilson, C. S.	1994	Wilson 1994
Nutrition and food systems.	HLPE. (2017). Nutrition and food systems. A report by the High Level Panel of Experts on Food Security and Nutrition.	2017	HLPE 2017
A Community-Level Initiative to Prevent Obesity: Results From Kaiser Permanente’s Healthy Eating Active Living Zones Initiative in California	Cheadle, Allen, PhD; Atiedu, Akpene, MPH, MA; Rauzon, Suzanne, MPH; Schwartz, Pamela M, MPH; Keene, Laura, MPH; Davoudi, Mehrnaz, MPH; Spring, Rebecca, MPH; Molina, Michelle, MA; Lee, Lynda, MA; Boyle, Kathryn, BA; Williamson, Dana, MPH; Steimberg, Clara, MHA; Tinajero, Roberta, BA; Ravel, Jodi, MPH; Nudelman, Jean, MPH; Azuma, Andrea Misako, MS; Kuo, Elena S, PhD, MPH; Solomon, Loel, PhD	2018	Cheadle 2018
Why sustainable and 'nutritionally correct' food is not on the agenda: Western Sydney, the moral arts of everyday life and public policy.	Dixon, J.; Isaacs, B.	2013	Dixon 2013
State Preemption of Food and Nutrition Policies and Litigation: Undermining Government's Role in Public Health	Pomeranz, Jennifer L, JD, MPH; Zellers, Leslie JD; Bare, Michael, MPH; Pertschuk, Mark, JD	2019	Pomeranz 2019
International moves to strengthen food policies	Lobstein, T.	2009	Lobstein 2009
The One Planet Sustainable Food Systems (SFS) Programme as a multistakeholder platform for a systemic approach.	Solon, M. M.; Mink, P.; Dernini, S.; Bortoletti, M.; Lomax, J.	2019	Solon 2019
Review of methodologies for assessing sustainable diets and potential for development of harmonised indicators	Eme, Paul Eze; Kim, Nicholas; Burlingame, Barbara; Douwes, Jeroen; Foliaki, Sunia	2019	Eme 2019
Application of the Nutrition Functional Diversity indicator to assess food system contributions to dietary diversity and sustainable diets of Malawian households	Luckett, Brian G.; DeClerck, Fabrice A. J; Fanzo, Jessica; Mundorf, Adrienne R.; Rose, Donald	2015	Luckett 2015
How ethnobiology can contribute to food security.	Kuhnlein, H. V.	2014	Kuhnlein 2014
Why food in health security (FIHS)?	Wahlqvist, M. L. (2009). Why food in health security (FIHS)?. Asia Pacific journal of clinical nutrition, 18(4), 480-485.	2009	Wahlqvist 2009
Obesity and the future of food policies that promote healthy diets	Peeters, Anna	2018	Peeters 2018
City region food systems and food waste management: linking urban and rural areas for sustainable and resilient development.	Dubbeling, M.; Bucatariu, C.; Santini, G.; Vogt, C.; Eisenbeiss, K.	2017	Dubbeling 2017
Using Input-Output Analysis to Measure Healthy, Sustainable Food Systems	Boylan, S. M.; Thow, A. M.; Tyedmers, E. K.; Malik, A.; Salem, J.; Alders, R.; Raubenheimer, D.; Lenzen, M.	2020	Boylan 2020
Sociocultural Influences on Food Choices and Implications for Sustainable Healthy Diets	Monterrosa, Eva C.; Frongillo, Edward A.; Drewnowski, Adam; de Pee, Saskia; Vandevijvere, Stefanie	2020	Monterrosa 2020
How to create a sustainable food system with affordable, accessible, and available health promoting food-a policy perspective	Schindler, K.	2018	Schindler 2018
Improving human nutrition from the ground up: Linking agriculture to human health	Welch, R.M.	2011	Welch 2011
Aligning food systems policies to advance public health	Muller, Mark; Tagtow, Angie; Roberts, Susan L.; Erin, MacDougall	2009	Muller 2009
Mapping disruption and resilience mechanisms in food systems.	Savary, S.; Akter, S.; Almekinders, C.; Harris, J.; Korsten, L.; Rotter, R.	2020	Savary 2020
Designing lifestyle-specific food policies based on nutritional requirements and ecological footprints	Mózner, Zsófia Vetöné; Csutora, Mária	2013	Mózner 2013
Indigenous and tribal foods for addressing food and nutrition security in two tribal communities of Jharkhand, India	Ghosh-Jerath, S.; Kamboj, P.; Singh, A.; Magsumbol, M.S.; Goldberg, G.	2013	Ghosh-Jerath 2013
The role of pulses in sustainable and healthy food systems	McDermott, John; Wyatt, Amanda J.	2017	McDermott 2017
Improving diets through food systems in low- and middle-income countries metrics for analysis.	Melesse, M. B.; Berg, M. van den; Bene, C.; Brouwer, I. D.; Brauw, A. de	2019	Melesse 2019
Diet transformation in Africa: the case of Ethiopia.	Worku, I. H.; Dereje, M.; Bart Minten; Kalle Hirvonen	2017	Worku 2017
The role of agriculture in improving nutrition in the global context: Commitments guidelines and the rome-based agencies	Dufour, Charlotte; Garrett, James; Friedrich, Juliane; Kennedy, Gina; Aburto, Nancy; Marshall, Quinn	2017	Dufour 2017
Youth, urban governance, and sustainable food systems: the cases of Hamilton and Victoria, Canada.	Botelho, Z.	1999	Botelho 1999
Measuring food insecurity using the food abundance index: Implications for economic, health and social well-being	Murrell, Audrey; Jones, Ray	2020	Murrell 2020
Food systems and food security: A conceptual model for identifying food system deficiencies	Rutten, Lila Finney; Yaroch, Amy Lazarus; Story, Mary	2011	Rutten 2011
Monitoring the price and affordability of foods and diets globally	Lee, A.; Mhurchu, C.N.; Vandevijvere, S.; Sacks, G.; Swinburn, B.; Snowdon, W.; Hawkes, C.; L'Abbe, M.; Rayner, M.; Sanders, D.; Barquera, S.; Friel, S.; Kelly, B.; Kumanyika, S.; Lobstein, T.; Ma, J.; Macmullan, J.; Mohan, S.; Monteiro, C.; Neal, B.; Walker, C.	2013	Lee 2013
Climate change and sustainable and healthy diets.	Pahlen, C. T. von der	2019	Pahlen 2019
Evaluating the sustainability of diets-combining environmental and nutritional aspects	Roos, Elin; Karlsson, Hanna; Sundberg, Cecilia; Witthoft, Cornelia	2015	Roos 2015
Putting all foods on the same table: Achieving sustainable food systems requires full accounting	Kuempel, Caitlin D.; Halpern, Benjamin S.; Cottrell, Richard S.; Blanchard, Julia L.; Nash, Kirsty L.; Bouwman, Lex; Froehlich, Halley E.; Gephart, Jessica A.; Jacobsen, Nis Sand; McIntyre, Peter B.; Metian, Marc; Moran, Daniel D.; Tobben, Johannes; Williams, David R.	2019	Kuempel 2019
Shaping Physical, Economic, and Policy Components of the Food Environment to Create Sustainable Healthy Diets	Drewnowski, Adam; Monterrosa, Eva C.; de Pee, Saskia; Frongillo, Edward A.; Vandevijvere, Stefanie	2020	Drewnowski 2020
A Food Systems Approach To Healthy Food And Agriculture Policy	Neff, Roni A; Merrigan, Kathleen; Wallinga, David	2015	Neff 2015
Enhancing Linkages Between Healthy Diets, Local Agriculture, and Sustainable Food Systems: The School Meals Planner Package in Ghana	Fernandes, Meenakshi; Galloway, Rae; Hamdani, Salha; Kiamba, Josephine; Aurino, Elisabetta; Peel, Francis; Drake, Lesley; Gelli, Aulo; Mumuni, Daniel; Quarshie, Kate; Bhatia, Rita	2016	Fernandes 2016
A new health care prevention agenda: sustainable food procurement and agricultural policy.	Harvie, J.; Mikkelsen, L.; Shak, L.	2009	Harvie 2009
Policy Action Within Urban African Food Systems to Promote Healthy Food Consumption: A Realist Synthesis in Ghana and Kenya	Booth, Andrew; Barnes, Amy; Akparibo, Robert; Bash, Kristin; Laar, Amos; Graham, Fiona; Asiki, Gershim; Holdsworth, Michelle	2021	Booth 2021
Food security, food safety & healthy nutrition: are they compatible?	Walls, H.; Baker, P.; Chirwa, E.; Hawkins, B.	2019	Walls 2019
Poverty does not modify the association between perceived diet healthiness and adherence to nutritional guidelines in the constances cohort (France).	Plessz, M.; Kesse-Guyot, E.; Zins, M.; Matta, J.; Czernichow, S.	2019	Plessz 2019
Healthy foods and healthy diets. How government policies can steer food reformulation	Frost, Gary; Gressier, Mathilde; Sassi, Franco	2020	Frost 2020
Consumers' sense of farmers' markets: tasting sustainability or just purchasing food?	Giampietri, E.; Koemle, D. B. A.; Yu XiaoHua; Finco, A.	2016	Giampietri 2016
Integrated mixed methods policy analysis for sustainable food systems: Trends, challenges and future research	Cuevas, Soledad	2016	Cuevas 2016
Using price policies to promote healthier diets.	World Health Organization. (2015). Using price policies to promote healthier diets. World Health Organization. Regional Office for Europe.	2015	WHO 2015
Articulated food systems and transverse to food security.	VertigO, 2014	2014	VertigO 2014
Promoting healthy diets and tackling obesity and diet-related chronic diseases: What are the agricultural policy levers?	Hawkes, Corinna	2007	Hawkes 2007
Adapting food systems of the Indo-Gangetic plains to global environmental change: Key information needs to improve policy formulation	Aggarwal, P.K.; Joshi, P.K.; Ingram, J.S.I.; Gupta, R.K.	2004	Aggarwal 2004
Importance of adequate policies for the implementation of sustainable food systems: the case of Mexico.	Cabada, X.; Calvillo, A.	2014	Cabada 2014
Moving local food through conventional food system infrastructure: value chain framework comparisons and insights.	Bloom, J. D.; Hinrichs, C. C.	2011	Bloom 2011
The politics of food in the Pacific: coherence and tension in regional policies on nutrition, the food environment and non-communicable diseases	Dodd, Rebecca; Sparks, Emalie; Webster, Jacqui; Reeve, Erica; George, Anita; Buresova, Dai; Vivili, Paula; Win Tin, Si Thu; Thow, Anne-Marie	2020	Dodd 2020
Food value chain transformations in developing countries: selected hypotheses on nutritional implications.	Gomez, M. I.; Ricketts, K. D.	2013	Gomez 2013
Sustainable diets: linking nutrition and food systems.	Burlingame, B.; Dernini, S.	2019	Burlingame 2019
A multi-country survey of public support for food policies to promote healthy diets: Findings from the International Food Policy Study	Kwon, Janelle; Cameron, Adrian J.; Sacks, Gary; Hammond, David; White, Christine M.; Vanderlee, Lana; Bhawra, Jasmin	2019	Kwon 2019
Nutrition-sensitive agriculture and food systems in practice: options for intervention.	Lartey, A.	2017	Lartey 2017
Local challenges and successes associated with transitioning to sustainable food system practices for a west Australian context: Multi-sector stakeholder perceptions	Sambell, Ros; Andrew, Lesley; Godrich, Stephanie; Devine, Amanda; Wolfgang, Justin; Vandenbroeck, Dieter; Stubley, Katie; Rose, Nick; Newman, Lenore; Horwitz, Pierre	2019	Sambell 2019
Environmental sustainability perspectives of the nordic diet	Meltzer, Helle Margrete; Brantsaeter, Anne Lise; Trolle, Ellen; Eneroth, Hanna; Fogelholm, Mikael; Ydersbond, Trond Arild; Birgisdottir, Bryndis Eva	2019	Meltzer 2019
The global face of nutrition: what can governments and industry do?	Kennedy, E. T.	2005	Kennedy 2005
Healthy diets ASAP - Australian Standardised Affordability and Pricing methods protocol	Lee, Amanda J; Lewis, Meron; Kane, Sarah; Good, Elizabeth; Dick, Mathew; Landrigan, Timothy J; Pollard, Christina M	2018	Lee 2018
Testing the price of healthy and current diets in remote aboriginal communities to improve food security: Development of the aboriginal and torres strait islander healthy diets ASAP (Australian standardised affordability and pricing) methods	Lewis, Meron; Lee, Amanda	2018	Lewis 2018
Sustainable and healthy diets: Synergies and trade-offs in Switzerland	Kopainsky, B.; Frehner, A.; Muller, A.	2020	Kopainsky 2020
Rural transformation and the double burden of malnutrition among rural youth in developing countries.	Suneetha Kadiyala; Aurino, E.; Cirillo, C.; Srinivasan, C.; Zanello, G.	2019	SuneethaKadiyala 2019
Streamlined data-gathering techniques to estimate the price and affordability of healthy and unhealthy diets under different pricing scenarios	Zorbas, Christina; Peeters, Anna; Backholer, Kathryn; Lee, Amanda; Lewis, Meron; Landrigan, Timothy	2021	Zorbas 2021
How the food industry can contribute to healthy and sustainable food systems	Spieldenner, Jorg	2015	Spieldenner 2015
Contribution to the development of a food guide in Benin: linear programming for the optimization of local diets	Levesque, Sarah; Delisle, Helene; Agueh, Victoire	2015	Levesque 2015
Building local food governance: the case of the food plan of the Pisa province.	Rossi, A.; Fastelli, L.; Innocenti, S.	2015	Rossi 2015
Highlighting interlinkages between sustainable diets and sustainable food systems.	Meybeck, A.; Gitz, V.	2019	Meybeck 2019
Climate smart food supply chains in developing countries in an era of rapid dual change in agrifood systems and the climate.	Reardon, T.; Zilberman, D.	2018	Reardon 2018
Comparing the Recommended Eating Patterns of the EAT-Lancet Commission and Dietary Guidelines for Americans: Implications for Sustainable Nutrition	Blackstone, Nicole Tichenor; Conrad, Zach	2020	Blackstone 2020
Sustainable food systems for optimal planetary health	Canavan, Chelsey R.; Noor, Ramadhani A.; Fawzi, Wafaie; Golden, Christopher D.; Juma, Calestous	2017	Canavan 2017
Climate smart nutrition: Co-benefits of nutrition-sensitive climate mitigation and adaptation	Amadeo, A.; Chen, K.; Tirado, M.C.; Mascarenas, A.	2015	Amadeo 2015
Estimates of the willingness to pay for locally grown tree fruits in Cusco, Peru	Blare, T.; Donovan, J.; del Pozo, C.	2019	Blare 2019
Today's food system: How healthy is it?	Wallinga, David	2009	Wallinga 2009
Improving policy evidence base for agricultural sustainability and food security: a content analysis of life cycle assessment research.	Gava, O.; Bartolini, F.; Venturi, F.; Brunori, G.; Pardossi, A.	2020	Gava 2020
A scoping review of policies promoting and supporting sustainable food systems in the university setting	Grech, Amanda; Howse, Eloise; Boylan, Sinead	2020	Grech 2020
Getting it done: Frameworks, approaches, and tools for national capacities in agriculture and nutrition	Aburto, Nancy	2017	Aburto 2017
Effects of food policy actions on Indigenous Peoples' nutrition-related outcomes: a systematic review	Browne, J.; Lock, M.; Walker, T.; Egan, M.; Backholer, K.	2020	Browne 2020
Towards a code of conduct for sustainable diets.	Burlingame, B.	2019	Burlingame 2019
Designing a tax to discourage unhealthy food and beverage purchases: The case of Chile	Caro, J. C.; Ng, S. W.; Taillie, L. S.; Popkin, B. M.	2017	Caro 2017
Disintegration of traditional food systems as a challenge to food security: a case study of Kollimalai Hills in South India.	Bohle, H. G.	1992	Bohle 1992
Transferability of private food marketing success factors to public food and health policy: an expert Delphi survey.	Aschemann-Witzel, J.; Perez-Cueto, F. J. A.; Niedzwiedzka, B.; Verbeke, W.; Bech-Larsen, T.	2012	Aschemann-Witzel 2012
Shifting the Balance: Getting the Private Sector to Favour Nutritious, Affordable and Accessible Diets	(World Food Regulation Review, 2018)	2018	World Food Regulation 2018
Writing a recipe for teaching sustainable food systems: lessons from three university courses.	Brekken, C. A.; Peterson, H. H.; King, R. P.; Conner, D.	2018	Brekken 2018

## Sheet: Wrong type of document
Title	Authors	Published Year	Study
The state of food and agriculture: food systems for better nutrition.	UN Food and Agriculture Organization. (2014). The State of Food and Agriculture. Food Systems for Better Nutrition.	2013	UN 2014
Intelligent agrifood chains and networks: current status, future trends and real-life cases from Japan.	Voros, M.; Gemma, M.	2011	Voros 2011
Integrating agriculture and food policy to achieve sustainable peri-urban fruit and vegetable production in Victoria, Australia.	Carey, R.; Krumholz, F.; Duignan, K.; McConell, K.; Browne, J. L.; Burns, C.; Lawrence, M.	2010	Carey 2010
Securing sustainable and nutritious food systems through mainstreaming agricultural biodiversity: An interdisciplinary study	Tutwiler, Ann; Padulosi, Stefano; Hunter, Danny	2017	Tutwiler 2017
Developing an integrated, sustainable urban food system: the case of New Jersey, United States.	Hamm, M. W.; Baron, M.	1999	Hamm 1999
Redirecting investment for a global food system that is sustainable and promotes healthy diets.	Morrison, J.; Bianchi, E.; Bowyer, C.; Vos, R.; Wellesley, L.	2018	Morrison 2018
Improving the school food environment through policy: a case study of challenges and recommendations from Mexico.	Macari, M.; Bahena, L.; Torres, F.; Berner, R.; Calvillo, A.	2019	Macari 2019
School lunches: getting healthy food on the menu in government-sponsored lunch programmes in the United States and Brazil	Feldman, Charles; Veiros, Marcela Boro; McGill, Tonya	2018	Feldman 2018
Biodiversity loss: we need to move from uniformity to diversity.	Frison, E. A.; Jacobs, N.	2019	Frison 2019
Identification of traditional food resources and their importance in a rural farming community in Southwestern Nigeria	Ejoh, S.I.; Akinyele, I.O.	2013	Ejoh 2013
Determining key research areas for healthier diets and sustainable food systems in Viet Nam.	Raneri, J. E.; Kennedy, G.; Trang Nguyen; Wertheim-Heck, S.; Haan, S. de; Ha Do; Nguyen Phuong; Le Thi Huong; Truong Tuyet Mai; Thanh Thi Duong; Nguyen Hung; Tuan Nguyen; Tuyen Huynh; Nodari, G. R.; Spellman, O.; Talsma, E. F.; Stoian, D.; Minh Cam Duong; Lam Nguyen Tran; Bene, C.	2019	Raneri 2019
Current concepts and applied research in sustainable food processing.	Martindale, W.; Finnigan, T.; Needham, L.	2014	Martindale 2014
Food and nutrient gaps in rural Northern Ghana: Does production of smallholder farming households support adoption of food-based dietary guidelines?	de Jager, I.; Giller, K. E.; Brouwer, I. D.	2018	deJager 2018
The Role of Food Systems in Shaping Diets and Addressing Malnutrition: Delivering on the Sustainable Development Agenda	Hemrich, Gunter	2020	Hemrich 2020
Transforming food systems under climate change: local to global policy as a catalyst for change.	Rawe, T.; Antonelli, M.; Chatrchyan, A.; Clayton, T.; Fanzo, J.; Gonsalves, J.; Matthews, A.; Nierenberg, D.; Zurek, M.	2019	Rawe 2019
Unravelling the Food-Health Nexus to Build Healthier Food Systems	Yambi, Olivia; Jacobs, Nicholas; Rocha, Cecilia	2020	Yambi 2020
Moving obesity prevention to the non-health sector	Moodie, Marj; Carter, Rob; Swinburn, Boyd; Allender, Steve; Osborne, Richard; Lawrence, Mark	2013	Moodie 2013
Food systems for healthier diets in Ethiopia: toward a research agenda.	Mestawet Gebru; Remans, R.; Brouwer, I.; Kaleab Baye; Melesse, M. B.; Covic, N.; Fekadu Habtamu; Alem Hadera Abay; Tesfaye Hailu; Hirvonen, K.; Kassaye, T.; Kennedy, G.; Lachat, C.; Ferew Lemma; McDermott, J.; Minten, B.; Tibebu Moges; Fidaku Reta; Eneye Tadesse; Tamene Taye; Truebswasser, U.; Vandenberg, M.	2018	MestawetGebru 2018
The Push, Pull, and Enabling Capacities Necessary for Legume Grain Inclusion into Sustainable Agri-Food Systems and Healthy Diets	Vasconcelos, Marta W.; Gomes, Ana M.; Pinto, Elisabete; Ferreira, Helena; Vieira, Evla D F; Martins, Ana P.; Santos, Carla S.; Balazs, Balint; Kelemen, Eszter; Hamann, Karen T.; Williams, Michael; Iannetta, Pietro P M	2020	Vasconcelos 2020

## Sheet: Not available
Title	Authors	Published Year	Study
Food policy, systems, and environment: strategies for making healthful food the easiest choice.	Tagtow, A.; Clancy, K.; Gussow, J.; Sanchez, E. J.; Story, M.; Wilkins, J. L.	2011	Tagtow 2011
Fruits and vegetables: a neglected wealth in developing countries.	Ganry, J.; Egal, F.; Taylor, M.	2011	Ganry 2011
Towards sustainable food systems: a holistic, interdisciplinary and systemic approach.	Moscatelli, S.; El-Bilali, H.; Gamboni, M.; Capone, R.	2016	Moscatelli 2016
Our quest for healthy diets: The role of nutrition scientists	Lartey, Anna	2017	Lartey 2017
Homeland security planning: what victory gardens and fidel castro can teach us in preparing for food crises in the United States.	Endres, A. B.; Endres, J. M.	2009	Endres 2009
How to do it better: Evidence and communications for healthy diets and sustainable agriculture and food systems	Kennedy, Gina	2017	Kennedy 2017
Are healthy diets really more expensive and How would potential policy changes impact affordability?	Lee, A.J.; Kane, S.	2016	Lee 2016
Econutrition within reach: A framework to assist decision-making in large-scale nutrition interventions	Fanzo, J.; Luckett, B.; Rose, D.; Clerck, F.D.	2013	Fanzo 2013
Local solutions for global target of sustainable food and nutrition.	Mohammadi-Nasrabadi, F.	2018	Mohammadi-Nasrabadi 2018
A keystone for sustainable development.	Defait, V.	2019	Defait 2019
The Development of a Provincial Food and Nutrition Strategy through Cross-Sector Collaboration	Roblin, Lynn; Truscott, Rebecca; Boddy, Meaghan R.	2018	Roblin 2018
New approaches in securing more sustainable urban food futures: case from Cologne-Bonn region.	Heuschkel, Z.; Hirsch, D.; Terlau, W.; Lorleberg, W.	2018	Heuschkel 2018
How Can Dietitians Leverage Change for Sustainable Food Systems in Canada?	Carlsson, Liesel; Broman, Goran; Callaghan, Edith	2019	Carlsson 2019

## Sheet: Duplicate
Title	Authors	Published Year	Study
Special Issue: Sustainable food systems for healthy diets in Europe and Central Asia.	Dupouy, E., & Gurinovic, M. (2020). Sustainable food systems for healthy diets in Europe and Central Asia: Introduction to the special issue. Food Policy, 96, 101952.	2020	Dupouy 2015
